# Supplementary material for: Highly stable humidity sensor based on lead-free Cs3Bi2Br9 perovskite for breath monitoring
Source: Royal Society of Chemistry journal article supplement (doi:10.1039/d1tc02339j), 2021-01-01
Supplement: d1tc02339j2.pdf [file d1tc02339j2.pdf]

## Supporting Information

### Highly Stable Humidity Sensor Based on Lead-free Cs<sub>3</sub>Bi<sub>2</sub>Br<sub>9</sub> Perovskite for Breath Monitoring

Chaojie Pi,<sup>ab</sup> Weiqing Chen,<sup>b</sup> Wei Zhou,<sup>b</sup> Shuangpeng Yan,<sup>b</sup> Zhichao Liu,<sup>b</sup> Chao  
Wang,<sup>b</sup> Qian Guo,<sup>a</sup> Jianbei Qiu,<sup>b</sup> Xue Yu,<sup>\*b</sup> Bitao Liu<sup>\*ab</sup> and Xuhui Xu<sup>\*b</sup>

<sup>a</sup> Research Institute for New Materials Technology, Chongqing University of Arts and  
Sciences Chongqing 402160, P. R. China.

<sup>b</sup> College of Materials Science and Engineering, Kunming University of Science and  
Technology, Kunming 650093, P.R. China

\* Corresponding Author: E-mails: xuxuh07@126.com

E-mails: liubitao007@163.com

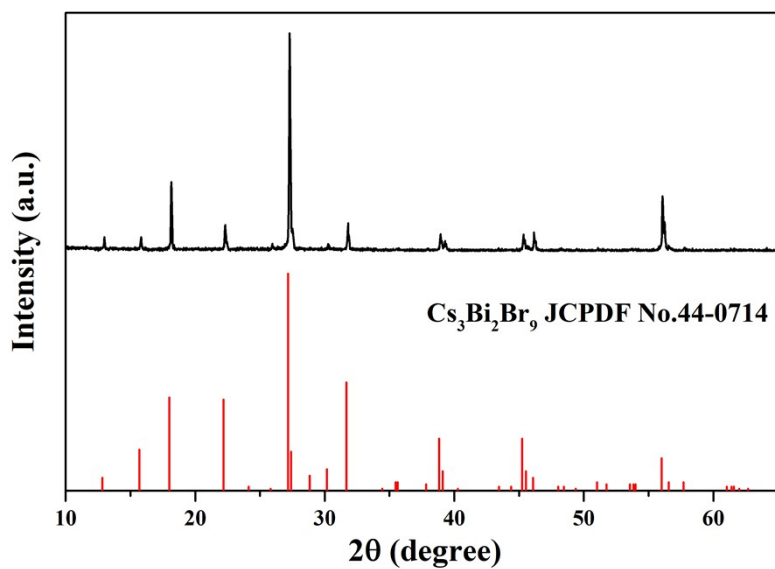

**Figure S1.** XRD patterns of the as-prepared Cs<sub>3</sub>Bi<sub>2</sub>Br<sub>9</sub> perovskite.

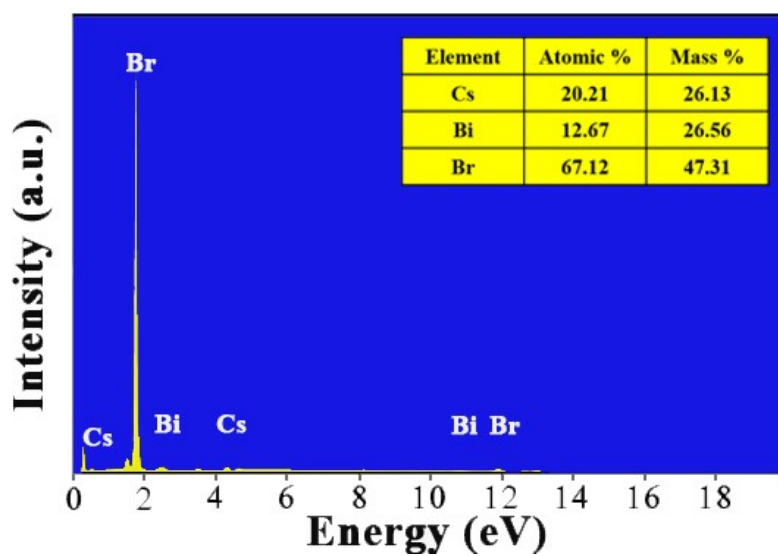

**Figure S2.** EDX spectroscopy of the Cs<sub>3</sub>Bi<sub>2</sub>Br<sub>9</sub>, the inset is the average atom and weight percentage of Cs/Bi/Br.

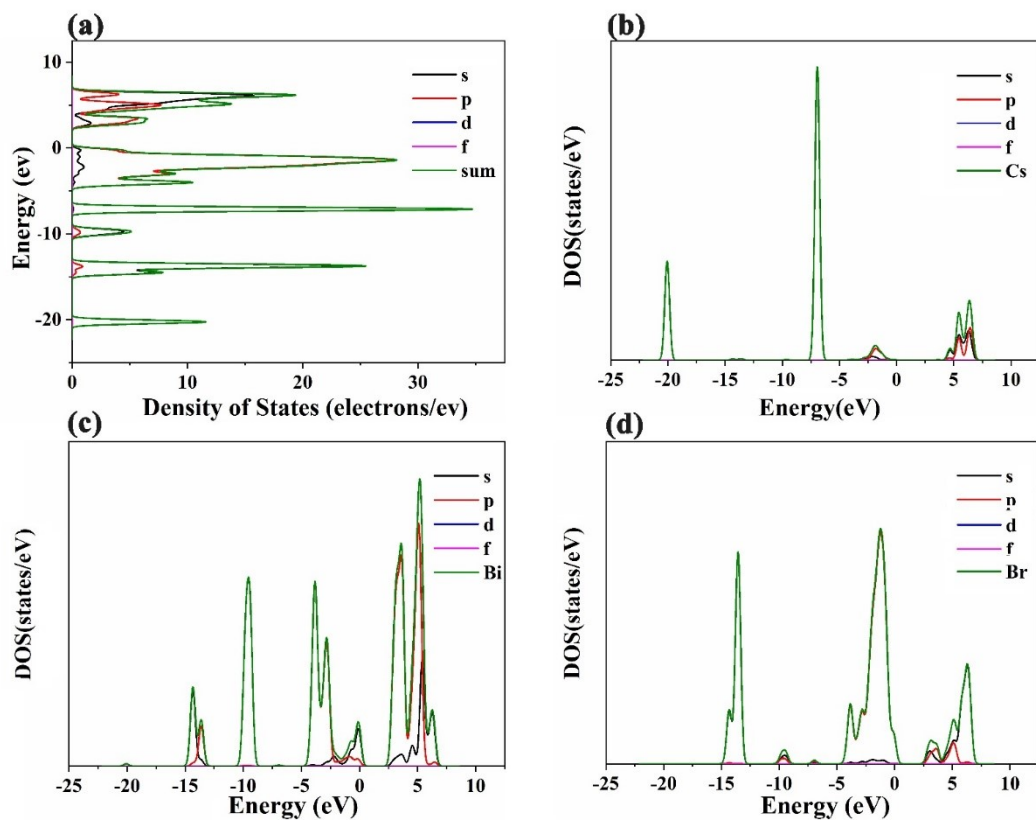

Figure S3. The partial density of states (PDOS) of  $\text{Cs}_3\text{Bi}_2\text{Br}_9$ .

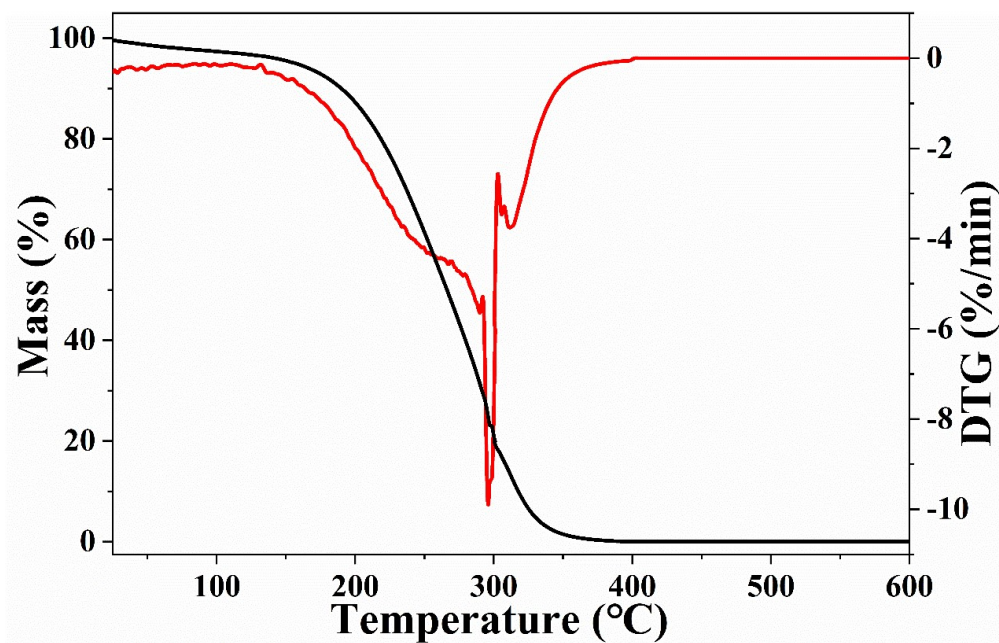

Figure S4. TG and DTG curves of  $\text{Cs}_3\text{Bi}_2\text{Br}_9$ .

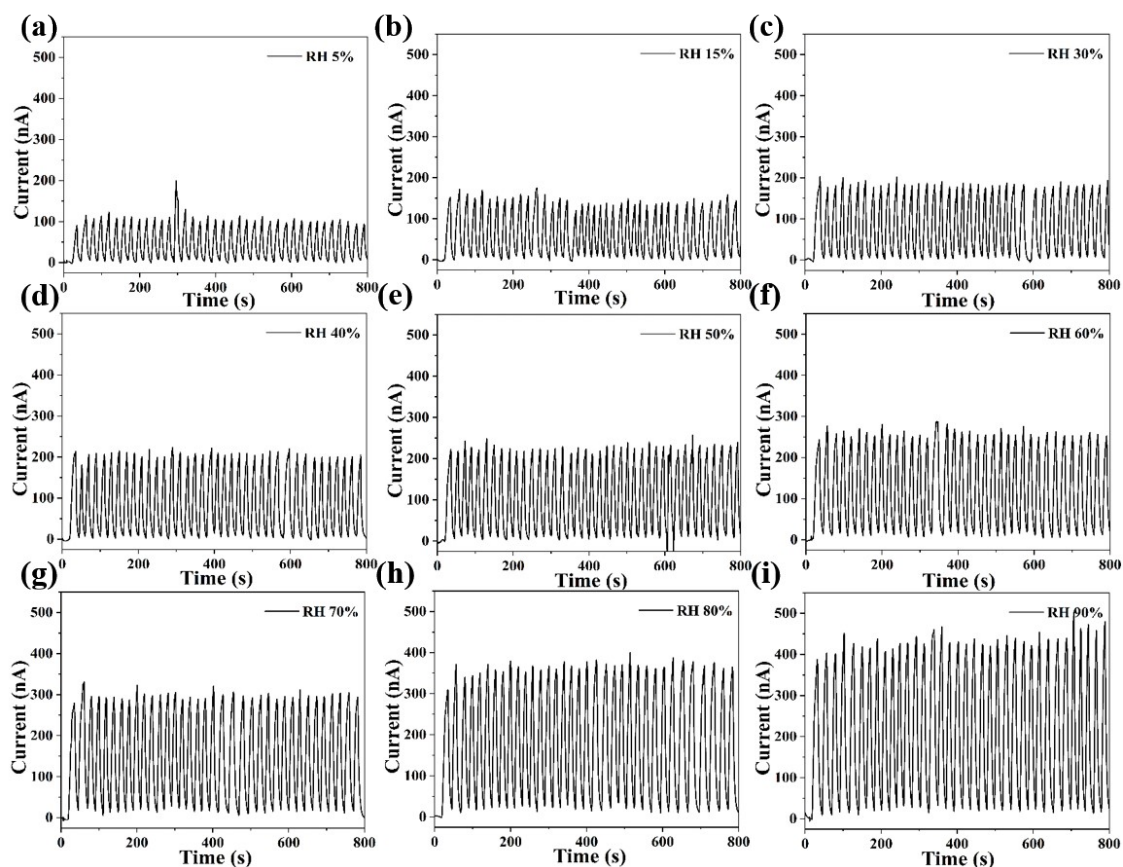

**Figure S5.** The response and the recovery curves of  $\text{Cs}_3\text{Bi}_2\text{Br}_9$  measured at various RH levels (under 0.1 V bias)

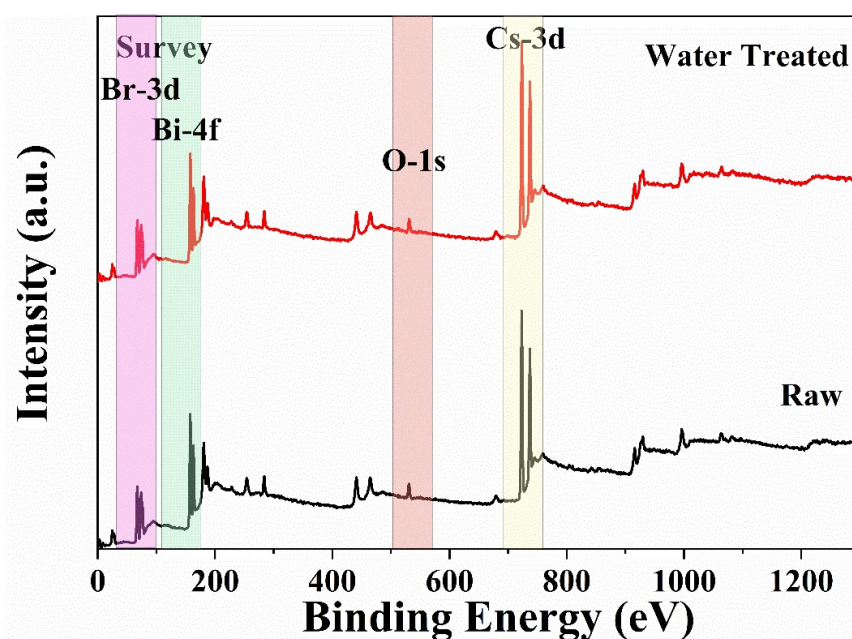

**Figure S6.** XPS spectra of the untreated and water treated  $\text{Cs}_3\text{Bi}_2\text{Br}_9$ .
